# Supplementary material
Source: PubMed Central journal article supplement (PMC8297704)
Supplement: ofab149_supplementary_material.pdf [file ofab149_supplementary_material.pdf]

## A. Personal Data

| Variable                         | Type       | Réponses            |
|----------------------------------|------------|---------------------|
| 1. Last name                     | Texte      |                     |
| 2. First name                    | Texte      |                     |
| 3. Date of birth                 | Date       | dd/mm/yyyy          |
| 4. Gender                        | Catégoriel | Woman / man / other |
| Home address                     |            |                     |
| 5. Care of (C/o)                 | Texte      |                     |
| 6. Street name                   | Texte      |                     |
| 7. Street number                 | Nombre     | ###                 |
| 8. Floor number                  | Nombre     | ##                  |
| 9. Postcode                      | Nombre     | #####               |
| 10. Locality (City/Town/Village) | Texte      |                     |
| 11. Phone number                 | Nombre     | ### / ### ## ##     |
| 12. Email address                | Texte      | _____@_____         |

## B. Questionnaire data

| Variable                                                                     | Type           | Réponses                                                                                              |
|------------------------------------------------------------------------------|----------------|-------------------------------------------------------------------------------------------------------|
| 13. I am filling in this questionnaire for                                   | Catégoriel     | myself / other person                                                                                 |
| 14. Date of filling in the questionnaire                                     | Date           | dd/mm/yyyy                                                                                            |
| 15. Where are you filling in the questionnaire (only one possible answer)?   | Menu déroulant | Home or work / Lausanne study center / Rennaz study center / Yverdon study center / Nyon study center |
| 16. I am filling in this questionnaire with the help of a study investigator | Binaire        | yes / no                                                                                              |
| 17. <i>Si oui à 16.</i> Last name of the study investigator                  | Texte          |                                                                                                       |
| 18. <i>Si oui à 16.</i> First name of the study investigator                 | Texte          |                                                                                                       |

## C. Medical history

| Variable                                                                                                                                                                     | Type           | Réponses                                                                                                                                                                                       |
|------------------------------------------------------------------------------------------------------------------------------------------------------------------------------|----------------|------------------------------------------------------------------------------------------------------------------------------------------------------------------------------------------------|
| 19. <i>Si femme à 4.</i> Are you pregnant or have you given birth in 2020?                                                                                                   | Catégoriel     | no / I am currently pregnant/ I gave birth in 2020                                                                                                                                             |
| 20. <i>Si enceinte à 19.</i> When is your due date?                                                                                                                          | Date           | dd/mm/yyyy                                                                                                                                                                                     |
| 21. <i>Si accouché à 19.</i> When did you give birth?                                                                                                                        | Date           | dd/mm/yyyy                                                                                                                                                                                     |
| Do you have the following diseases?                                                                                                                                          |                |                                                                                                                                                                                                |
| 22. Arterial hypertension (high blood pressure)                                                                                                                              | Binaire        | yes / no                                                                                                                                                                                       |
| 23. <i>Si oui à 22.</i> Does this hypertension require medication?                                                                                                           | Binaire        | yes / no                                                                                                                                                                                       |
| 24. <i>Si oui à 23.</i> Is this hypertension well controlled with the medication?                                                                                            | Binaire        | yes / no                                                                                                                                                                                       |
| 25. Diabetes                                                                                                                                                                 | Binaire        | yes / no                                                                                                                                                                                       |
| 26. <i>Si oui à 25.</i> Does this diabetes require medication?                                                                                                               | Binaire        | yes / no                                                                                                                                                                                       |
| 27. <i>Si oui à 25.</i> Is this diabetes well controlled with this medication?                                                                                               | Binaire        | yes / no                                                                                                                                                                                       |
| 28. Cardiovascular disease (heart failure, history of heart attack or stroke, heart valve disease)                                                                           | Binaire        | yes / no                                                                                                                                                                                       |
| 29. Kidney disease (impaired renal function) ?                                                                                                                               | Binaire        | yes / no                                                                                                                                                                                       |
| 30. Chronic respiratory disease (other than asthma well controlled by medication and sleep apnea syndrome)                                                                   | Binaire        | yes / no                                                                                                                                                                                       |
| 31. Immune system weakness due to a disease or a treatment                                                                                                                   | Binaire        | yes / no                                                                                                                                                                                       |
| 32. <i>Si oui à 28.</i> Which disease or treatment?                                                                                                                          | Texte          |                                                                                                                                                                                                |
| 33. Cancer currently under treatment                                                                                                                                         | Binaire        | yes / no                                                                                                                                                                                       |
| 34. Other chronic disease(s) or recurrent health problem                                                                                                                     | Binaire        | yes / no                                                                                                                                                                                       |
| 35. <i>Si oui à 31.</i> Which disease?                                                                                                                                       | Texte          |                                                                                                                                                                                                |
| 36. Do you currently take any medication?                                                                                                                                    | Binaire        | yes / no                                                                                                                                                                                       |
| 37. <i>Si oui à 33.</i> List all the medications you are taking (including painkillers, tranquilisers, sleeping pills and natural remedies)                                  | Texte          | Saisie semi-automatique                                                                                                                                                                        |
| 38. Currently, do you smoke (even occasionally) or use products containing nicotine (including electronic cigarettes and iQOS)?                                              | Catégoriel     | yes / no                                                                                                                                                                                       |
| 39. <i>Si oui à 38.</i> Currently, how often do smoke or use these products ?                                                                                                | Catégoriel     | daily / at least once a week but not everyday / less than once a week                                                                                                                          |
| 40. <i>Si oui à 38.</i> What do you smoke / which product do you use (several answers possible) ?                                                                            | Menu déroulant | - cigarettes<br>- electronic cigarettes (vaping) with or without nicotine<br>- heated tobacco products like iQOS (Pax, etc.)<br>- nicotine substitutes (patches, gums, inhaler,...)<br>- other |
| 41. <i>Si des cigarettes à 40.</i> On average, how many cigarettes do you smoke per day (less than one cigarette = 0, 1 pack = 20 cigarettes, / half a pack = 10 cigarettes) | Nombre         | ##                                                                                                                                                                                             |

|                                                                                                                                                                                                                 |            |                                                                                                                                                                                                  |
|-----------------------------------------------------------------------------------------------------------------------------------------------------------------------------------------------------------------|------------|--------------------------------------------------------------------------------------------------------------------------------------------------------------------------------------------------|
| 42. <i>Si des cigarettes électroniques à 40.</i> Which dosage of nicotine do you use on average (mg/ml) ?                                                                                                       | Catégoriel | 0 (sans nicotine) / moins de 6 / 6-12 / 13 ou plus                                                                                                                                               |
| 43. <i>Si non à 38.</i> Have you ever smoked regularly for more than 6 months ?                                                                                                                                 | Binaire    | yes / no                                                                                                                                                                                         |
| 44. <i>Si oui à 43.</i> When did you quit smoking ?                                                                                                                                                             | Catégoriel | - In the past 12 months<br>- Between one year and less than 2 years ago<br>- Between 2 years and less than 5 years ago<br>- Between 5 years and less than 10 years ago<br>- 10 years ago or more |
| 45. <i>Si oui à 38 ou oui à 43.</i> At what age did you start smoking regularly?                                                                                                                                | Nombre     | ##                                                                                                                                                                                               |
| 46. How tall are you (cm)?                                                                                                                                                                                      | Nombre     | ###                                                                                                                                                                                              |
| 47. How much do you weigh (kg)?                                                                                                                                                                                 | Nombre     | ###.#                                                                                                                                                                                            |
| 48. Have you gained weight since the end of February 2020?                                                                                                                                                      | Binaire    | yes / no                                                                                                                                                                                         |
| 49. <i>Si oui à 43.</i> How many kilos?                                                                                                                                                                         | Nombre     | ##                                                                                                                                                                                               |
| 50. Have you lost weight since the end of February 2020?                                                                                                                                                        | Binaire    | yes / no                                                                                                                                                                                         |
| 51. <i>Si oui à 45.</i> How many kilos?                                                                                                                                                                         | Nombre     | ##                                                                                                                                                                                               |
| 52. Do you get vaccinated against the flu?                                                                                                                                                                      | Catégoriel | Yes, every year (or almost), this winter included / yes, only this winter / yes but not this winter / no / I don't know                                                                          |
| 53. Have you ever been vaccinated against tuberculosis (BCG vaccine, the one that sometimes leaves a mark)?                                                                                                     | Binaire    | yes / no / I don't know                                                                                                                                                                          |
| 54. Since the end of February 2020, how many flu episodes (respiratory symptoms or impression of fever or sudden loss of taste/smell) did you have (without link to chronic disease or already known allergy) ? | Catégoriel | 0 / 1 / 2 / 3 / 4 / 5                                                                                                                                                                            |

**D. Flu-like symptoms and utilisation of health services** (*sous-questionnaire si oui à 47, un par épisode*)

| Variable                                                                                                                                                                                        | Type    | Réponses   |
|-------------------------------------------------------------------------------------------------------------------------------------------------------------------------------------------------|---------|------------|
| 1. When did this episode of flu-like symptoms begin? ( <i>even if you are not totally sure of the date, please provide a most probable one</i> )                                                | Date    | dd/mm/yyyy |
| 2. Is this episode finished?                                                                                                                                                                    | Binaire | yes / no   |
| 3. <i>Si oui à 2.</i> When did this episode finish (end of main symptoms)?                                                                                                                      | Date    | dd/mm/yyyy |
| During this this episode of flu-like symptoms? (several possible answers)                                                                                                                       |         |            |
| 4. I coughed                                                                                                                                                                                    | Coche   |            |
| 5. I had a runny or stuffy nose, I sneezed                                                                                                                                                      | Coche   |            |
| 6. I had a sore throat                                                                                                                                                                          | Coche   |            |
| 7. I was out of breath                                                                                                                                                                          | Coche   |            |
| 8. It felt like I had a fever                                                                                                                                                                   | Coche   |            |
| 9. I had a temperature of 37.5°C or higher (measured)                                                                                                                                           | Coche   |            |
| 10. I had a headache                                                                                                                                                                            | Coche   |            |
| 11. I had aching muscles / joints                                                                                                                                                               | Coche   |            |
| 12. I had chest / thorax/ sternum pain                                                                                                                                                          | Coche   |            |
| 13. I felt tired, exhausted                                                                                                                                                                     | Coche   |            |
| 14. I lost my appetite                                                                                                                                                                          | Coche   |            |
| 15. I felt nauseous, I was sick (vomited)                                                                                                                                                       | Coche   |            |
| 16. I had diarrhea                                                                                                                                                                              | Coche   |            |
| 17. I had a stomach ache                                                                                                                                                                        | Coche   |            |
| 18. All of a sudden, I lost my sense of smell or of taste for food/beverages                                                                                                                    | Coche   |            |
| 19. Other                                                                                                                                                                                       | Coche   |            |
| 20. <i>Si coche à 18.</i> What other symptoms did you have?                                                                                                                                     | Texte   |            |
| 21. Have you taken any anti-inflammatory drug such as aspirin (Aspégic), ibuprofen (Algifor, Irfen, Brufen) or diclofenac (Voltaren) or any true anti-inflammatory drug to treat your symptoms? | Binaire | yes / no   |
| 22. Did you contact or go to a healthcare provider (medical practice, emergency, telephone center) for this episode?                                                                            | Binaire | yes / no   |
| <i>Si oui à 21.</i> Which healthcare provider(s)? (several possible answers)                                                                                                                    |         |            |
| 23. hotline                                                                                                                                                                                     | Coche   |            |
| 24. On-call doctors telephone center (Centrale Téléphonique des Médecins de garde - CTMG)                                                                                                       | Coche   |            |
| 25. Ambulance (144)                                                                                                                                                                             | Coche   |            |
| 26. General Practitioner (GP)                                                                                                                                                                   | Coche   |            |
| 27. Pharmacist                                                                                                                                                                                  | Coche   |            |
| 28. Medical centre or outpatient clinic                                                                                                                                                         | Coche   |            |
| 29. <i>Si oui à 26.</i> Which one?                                                                                                                                                              | Texte   |            |
| 30. Other healthcare provider?                                                                                                                                                                  | Texte   |            |

|                                                                                                                                                                                     |                               |                                                                                                 |
|-------------------------------------------------------------------------------------------------------------------------------------------------------------------------------------|-------------------------------|-------------------------------------------------------------------------------------------------|
| 31. Were you admitted to hospital?                                                                                                                                                  | Binaire                       | yes / no                                                                                        |
| 32. <i>Si oui à 29.</i> In which establishment?                                                                                                                                     | Texte                         |                                                                                                 |
| 33. <i>Si oui à 29.</i> When were you admitted to the hospital?                                                                                                                     | Date                          | dd/mm/yyyy                                                                                      |
| 34. <i>Si oui à 29.</i> When were you discharged from hospital?                                                                                                                     | Date                          | dd/mm/yyyy                                                                                      |
| 35. <i>Si oui à 29.</i> Were you admitted to the Intensive Care Unit (ICU) during this hospitalisation?                                                                             | Binaire                       | yes / no                                                                                        |
| 36. <i>Si oui à 33.</i> Were you intubated during this hospitalisation?                                                                                                             | Binaire                       | yes / no                                                                                        |
| 37. Were you tested for COVID-19 by nasal or throat swab during this episode of flu-like symptoms?                                                                                  | Binaire                       | yes / no                                                                                        |
| 38. <i>Si oui à 35.</i> What were the results of this test(s) (several possible answers)?                                                                                           | Menu déroulant                | positive / negative / first negative than positive / still waiting for the results / don't know |
| 39. Did you got to work during this episode of flu-like symptoms?                                                                                                                   | Binaire                       | yes / no                                                                                        |
| 40. <i>Si oui à 37.</i> For how many days in total?                                                                                                                                 | Nombre                        | ###                                                                                             |
| 41. Did you stay at home without going out at all during this episode?                                                                                                              | Binaire                       | yes / no                                                                                        |
| 42. <i>Si oui à 39.</i> For how many days in total?                                                                                                                                 | Nombre                        | ###                                                                                             |
| 43. Among the people living under the same roof as you, how many of them stayed at home without going out at all?                                                                   | Nombre                        | #                                                                                               |
| 44. <i>Si ≥1 à 41.</i> For how many days in total?<br>Person 1<br>Person 2<br>Person 3...                                                                                           | Nombre<br>Nombre<br>Nombre... | ##<br>##<br>##...                                                                               |
| Which preventive measures did you take at home during this episode? (several possible answers)                                                                                      |                               |                                                                                                 |
| 45. You had food or other essential products, such as medicine, delivered to your house by a family member, a friend or a delivery service                                          | Coche                         |                                                                                                 |
| 46. You stayed in one room alone, with the door closed, and ate inside the room                                                                                                     | Coche                         |                                                                                                 |
| 47. You aired the room several times a day                                                                                                                                          | Coche                         |                                                                                                 |
| 48. You avoided all visitors and contact                                                                                                                                            | Coche                         |                                                                                                 |
| 49. You only left the room if necessary                                                                                                                                             | Coche                         |                                                                                                 |
| 50. You had a trash can in the room dedicated to used tissues                                                                                                                       | Coche                         |                                                                                                 |
| 51. You avoided all contact with pets                                                                                                                                               | Coche                         |                                                                                                 |
| 52. You used a bathroom solely dedicated to you, or if not possible, you cleaned the bathroom (sink, toilets, shower, bathtub) after each use with a regular household disinfectant | Coche                         |                                                                                                 |
| 53. You washed your hands before preparing food                                                                                                                                     | Coche                         |                                                                                                 |
| 54. You did not share cutlery, glasses, cups and kitchen utensils and you washed them carefully                                                                                     | Coche                         |                                                                                                 |
| 55. You washed clothes, bedding and towels several times a week                                                                                                                     | Coche                         |                                                                                                 |
| 56. You wore a mask when you left the room                                                                                                                                          | Coche                         |                                                                                                 |
| 57. You asked every person that entered the room to wear a mask                                                                                                                     | Coche                         |                                                                                                 |
| 58. You cleaned and disinfected, daily, any surface that you touched (door handles, bed frames and other bedroom furniture) with a regular household disinfectant                   | Coche                         |                                                                                                 |

## E. Place where you live

| Variable                                                                                                                                      | Type       | Réponses                                                         |
|-----------------------------------------------------------------------------------------------------------------------------------------------|------------|------------------------------------------------------------------|
| 55. What type of home do you live in?                                                                                                         | Catégoriel | Individual house / apartment / studio / residential home / other |
| 56. <i>Si autre à 55,</i> Please specify                                                                                                      | Texte      |                                                                  |
| 57. What is the approximate surface area of your home (m <sup>2</sup> )?                                                                      | Nombre     | ###                                                              |
| 58. How many habitable rooms do you have (apart from the kitchen)?                                                                            | Nombre     | ##                                                               |
| 59. How many separate bathrooms or toilets does your home have?                                                                               | Nombre     | #                                                                |
| 60. Do you have a balcony or a terrace?                                                                                                       | Binaire    | yes / no                                                         |
| 61. Do you have a private or shared garden?                                                                                                   | Binaire    | yes / no                                                         |
| 62. Do you have pets?                                                                                                                         | Catégoriel | dog / cat / dog and cat / other / none                           |
| 63. Since the end of February 2020, how many people live under the same roof as you (i.e. people sleeping there at least 3 nights per month)? | Nombre     | ##                                                               |

## F. Behaviour and exposure (in private)

| Variable                                                                                                                                                                    | Type       | Réponses                          |
|-----------------------------------------------------------------------------------------------------------------------------------------------------------------------------|------------|-----------------------------------|
| Today, in your <u>private</u> life, would you say that you are following proper preventive measures and practices to protect yourself and others from coronavirus, such as: |            |                                   |
| 64. Following simple hygiene rules (wash hands regularly, sneeze into your elbow, use a disposable tissue, etc.)?                                                           | Catégoriel | yes / mostly yes / mostly no / no |

**Supplementary material: e-Questionnaire filled by adult close contacts within household and outside (versions filled by index cases and child/teen participants are available upon request)**

|                                                                                                                                                                                     |                |                                                                                                                                                                                                                                                 |
|-------------------------------------------------------------------------------------------------------------------------------------------------------------------------------------|----------------|-------------------------------------------------------------------------------------------------------------------------------------------------------------------------------------------------------------------------------------------------|
| 65. Respecting « social distancing » rules (avoid shaking hands or kissing, stay at home, avoid leaving your home unless absolutely necessary, etc.)?                               | Catégoriel     | yes / mostly yes / mostly no / no                                                                                                                                                                                                               |
| 66. <u>During</u> the confinement (March 16 to May 10), on average, how many times per week do you or did you go outside to do grocery shopping?                                    | Nombre         | ##                                                                                                                                                                                                                                              |
| 67. <i>Si &gt;0 à 66.</i> Where do you do your grocery shopping?                                                                                                                    | Binaire        | Mainly small nearby businesses/ mainly supermarkets / both                                                                                                                                                                                      |
| 68. <i>Si &gt;0 à 68.</i> What mode of transport do/did you use most of the time to do your grocery shopping (only one possible answer)?                                            | Menu déroulant | car / public transport / motorcycle / bike / scooter / on foot                                                                                                                                                                                  |
| 69. <i>Si &gt;0 à 68.</i> What other mode of transport (second most frequent) do/did you use to do your grocery shopping (only one possible answer)?                                | Menu déroulant | car / public transport / motorcycle / bike / scooter / on foot / no other                                                                                                                                                                       |
| 70. <u>During</u> the confinement (March 16 to May 10), on average, how many times per week did other people living under the same roof as you go/went out to do grocery shopping ? | Nombre         | ##                                                                                                                                                                                                                                              |
| <u>During</u> the confinement (March 16 to May 10), which other trips did you make?                                                                                                 |                |                                                                                                                                                                                                                                                 |
| 71. A trip to go to your work place (number of times)                                                                                                                               | Nombre         | ###                                                                                                                                                                                                                                             |
| 72. A trip to go to the pharmacy (number of times)                                                                                                                                  | Nombre         | ##                                                                                                                                                                                                                                              |
| 73. A trip to go to the doctor (number of times)                                                                                                                                    | Nombre         | ##                                                                                                                                                                                                                                              |
| 74. A trip to go to a therapist other than a doctor (number of times)                                                                                                               | Nombre         | ##                                                                                                                                                                                                                                              |
| 75. A trip to go to the hairdresser or any other beauty care provider (number of times)                                                                                             | Nombre         | ##                                                                                                                                                                                                                                              |
| 76. A trip to go to a garden center or hardware store (number of times)                                                                                                             | Nombre         | ##                                                                                                                                                                                                                                              |
| 77. A trip to help your relatives (number of times)                                                                                                                                 | Nombre         | ##                                                                                                                                                                                                                                              |
| 78. A trip to visit people living in a EMS (seniors residential home) (number of times)                                                                                             | Nombre         | ##                                                                                                                                                                                                                                              |
| 79. A trip to visit family (number of times)                                                                                                                                        | Nombre         | ##                                                                                                                                                                                                                                              |
| 80. A trip to visit friends (number of times)                                                                                                                                       | Nombre         | ##                                                                                                                                                                                                                                              |
| 81. Other visits or trips (type)                                                                                                                                                    | Texte          |                                                                                                                                                                                                                                                 |
| 82. Other trips or visits (number of times)                                                                                                                                         | Nombre         | ##                                                                                                                                                                                                                                              |
| 83. <u>During</u> the confinement (March 16 to May 10), what mode of transport do/did you use most of the time for these trips (only one possible answer)?                          | Menu déroulant | car / public transport / motorcycle / bike / scooter / on foot                                                                                                                                                                                  |
| 84. <u>During</u> the confinement (March 16 to May 10), what other mode of transport (second most frequent) do/did you use for these trips (only one possible answer)?              | Menu déroulant | car / public transport / motorcycle / bike / scooter / on foot / no other                                                                                                                                                                       |
| 85. <u>During</u> the confinement (March 16 to May 10), on average, how many people do/did you meet per week apart from the people living under the same roof as you?               | Catégoriel     | 0 / 1 to 2 / 3 or 5 / 6 or 10 / more than 10                                                                                                                                                                                                    |
| <i>Si &gt;0 à 78.</i> In what context are/were you meeting these people?                                                                                                            |                |                                                                                                                                                                                                                                                 |
| 86. Meetings with friends                                                                                                                                                           | Coche          |                                                                                                                                                                                                                                                 |
| 87. Family reunions                                                                                                                                                                 | Coche          |                                                                                                                                                                                                                                                 |
| 88. Work                                                                                                                                                                            | Coche          |                                                                                                                                                                                                                                                 |
| 89. Public transport                                                                                                                                                                | Coche          |                                                                                                                                                                                                                                                 |
| 90. By car                                                                                                                                                                          | Coche          |                                                                                                                                                                                                                                                 |
| 91. Sports                                                                                                                                                                          | Coche          |                                                                                                                                                                                                                                                 |
| 92. Other                                                                                                                                                                           | Coche          |                                                                                                                                                                                                                                                 |
| 93. <i>Si coche à 85.</i> Please specify                                                                                                                                            | Texte          |                                                                                                                                                                                                                                                 |
| 94. <u>During</u> the confinement (March 16 to May 10), did you reduce the number of people you normally met/meet?                                                                  | Catégoriel     | Yes a lot / yes moderately / no                                                                                                                                                                                                                 |
| 95. Do you wear a mask in public?                                                                                                                                                   | Catégoriel     | no / yes, sometimes / yes, all the time                                                                                                                                                                                                         |
| <i>Si oui, parfois à 88.</i> In which situations (several possible answers) ?                                                                                                       |                |                                                                                                                                                                                                                                                 |
| 96. In public transport                                                                                                                                                             | Coche          |                                                                                                                                                                                                                                                 |
| 97. In shops                                                                                                                                                                        | Coche          |                                                                                                                                                                                                                                                 |
| 98. Other                                                                                                                                                                           | Coche          |                                                                                                                                                                                                                                                 |
| 99. <i>Si coche à 91.</i> Please specify                                                                                                                                            | Texte          |                                                                                                                                                                                                                                                 |
| <i>Si oui, parfois / oui, toujours à 88.</i> Which type of mask do/did you use in public spaces (several possible answers)?                                                         |                |                                                                                                                                                                                                                                                 |
| 100. Simple medical mask (also known as a surgical mask)                                                                                                                            | Coche          |                                                                                                                                                                                                                                                 |
| 101. Disposable mask made by myself                                                                                                                                                 | Coche          |                                                                                                                                                                                                                                                 |
| 102. Respiratory protection mask (also know as shell, duck or FFP2 mask)                                                                                                            | Coche          |                                                                                                                                                                                                                                                 |
| 103. Cloth mask                                                                                                                                                                     | Coche          |                                                                                                                                                                                                                                                 |
| 104. Did the confinement influence your consumption of cigarettes or other products with nicotine?                                                                                  | Menu déroulant | - I stopped smoking / using these products<br>- I diminished my consumption<br>- I did not change my consumption<br>- I increased my consumption<br>- I started again<br>- I did not start again<br>- I have never smoked / used these products |

|                                                                                                                                                                                                                                                                                                                                                      |                |                                                                                                  |
|------------------------------------------------------------------------------------------------------------------------------------------------------------------------------------------------------------------------------------------------------------------------------------------------------------------------------------------------------|----------------|--------------------------------------------------------------------------------------------------|
| 105. Since the end of February 2020, how many times have you travelled outside of Switzerland (apart from a professional activity in a neighbouring area)?                                                                                                                                                                                           | Nombre         | ##                                                                                               |
| <i>Si ≥1 à 97. Pour chaque voyage:</i>                                                                                                                                                                                                                                                                                                               |                |                                                                                                  |
| 106. In which country (several possible answers)?                                                                                                                                                                                                                                                                                                    | Menu déroulant | All the countries                                                                                |
| 107. Start date                                                                                                                                                                                                                                                                                                                                      | Date           | dd/mm/yyyy                                                                                       |
| 108. End date                                                                                                                                                                                                                                                                                                                                        | Date           | dd/mm/yyyy                                                                                       |
| 109. Apart from the people living under the same roof as you, how many people were you in close contact with (at less than 2 meters for more than 15 minutes) who had symptoms suggestive of COVID-19 (fever or cough or fatigue or out of breath or muscular pain or loss of taste/smell) while they were sick (or 48 hours before they were sick)? | Nombre         | ##                                                                                               |
| <i>Si ≥1 à 101. Pour chaque personne :</i>                                                                                                                                                                                                                                                                                                           |                |                                                                                                  |
| 110. What is the gender of this person?                                                                                                                                                                                                                                                                                                              | Catégoriel     | woman / man / other                                                                              |
| 111. How old is this person?                                                                                                                                                                                                                                                                                                                         | Nombre         | ##                                                                                               |
| 112. When was this contact made? (even if you are not totally sure of the date, please provide a most probable one)                                                                                                                                                                                                                                  | Date           | dd/mm/yyyy                                                                                       |
| 113. Was this person tested for COVID-19 with a nasal or throat swab during this episode?                                                                                                                                                                                                                                                            | Binaire        | yes / no / don't know                                                                            |
| 114. <i>Si oui à 105.</i> What were the results of the test(s) (only one possible answer)?                                                                                                                                                                                                                                                           | Menu déroulant | Positive / negative/ first negative than positive / still waiting for the results / I don't know |

## G. Formation, situation professionnelle

| Variable                                                                                                                                                               | Type           | Réponses                                                                                                                                                                                                                                                                                                                                                                                                                                                                                                                                                                                                                                                                                                                                                                 |
|------------------------------------------------------------------------------------------------------------------------------------------------------------------------|----------------|--------------------------------------------------------------------------------------------------------------------------------------------------------------------------------------------------------------------------------------------------------------------------------------------------------------------------------------------------------------------------------------------------------------------------------------------------------------------------------------------------------------------------------------------------------------------------------------------------------------------------------------------------------------------------------------------------------------------------------------------------------------------------|
| 115. What is the highest level of education that you have successfully achieved and for which you have obtained a diploma or a certificate (only one possible answer)? | Menu déroulant | <ul style="list-style-type: none"> <li>- No diploma</li> <li>- Compulsory school (Certificate of end of secondary school)</li> <li>- General/ vocational secondary education (Trade school, diploma)</li> <li>- Secondary education preparing for a trade (CFC)</li> <li>- General secondary education, superior level (maturité)</li> <li>- General secondary education preparing for a trade, superior level (specialised maturité)</li> <li>- Non-university higher education, 3 years or less</li> <li>- Non-university higher education, 3 years or more</li> <li>- University, EPFL/EPFZ</li> </ul>                                                                                                                                                                |
| 116. Which category best corresponds to your professional activity during the greatest number of years (only one possible answer)?                                     | Menu déroulant | <ul style="list-style-type: none"> <li>- Labourer, worker</li> <li>- Skilled worker, foreman</li> <li>- Farmer</li> <li>- Unqualified employee (e.g. Office assistant)</li> <li>- Qualified employee (e.g. secretary, accountant)</li> <li>- Middle management (e.g. technician, teacher)</li> <li>- Independant small business owner, craftsman</li> <li>- Senior management (e.g. economist, company lawyer)</li> <li>- Liberal profession (e.g. doctor, lawyer)</li> <li>- Director, head of a company or of a public service</li> <li>- At home without a profession, retired or no longer in business</li> <li>- Did not work for health reasons (invalidity, chronic disease, ...)</li> <li>- Did not work for reasons other than health (e.g. student)</li> </ul> |
| Currently, you are?                                                                                                                                                    |                |                                                                                                                                                                                                                                                                                                                                                                                                                                                                                                                                                                                                                                                                                                                                                                          |
| 117. Retired                                                                                                                                                           | Coche          |                                                                                                                                                                                                                                                                                                                                                                                                                                                                                                                                                                                                                                                                                                                                                                          |
| 118. A student                                                                                                                                                         | Coche          |                                                                                                                                                                                                                                                                                                                                                                                                                                                                                                                                                                                                                                                                                                                                                                          |
| 119. An independent worker                                                                                                                                             | Coche          |                                                                                                                                                                                                                                                                                                                                                                                                                                                                                                                                                                                                                                                                                                                                                                          |
| 120. An employee                                                                                                                                                       | Coche          |                                                                                                                                                                                                                                                                                                                                                                                                                                                                                                                                                                                                                                                                                                                                                                          |
| 121. A homemaker (house-wife or house-husband)                                                                                                                         | Coche          |                                                                                                                                                                                                                                                                                                                                                                                                                                                                                                                                                                                                                                                                                                                                                                          |
| 122. Unemployed                                                                                                                                                        | Coche          |                                                                                                                                                                                                                                                                                                                                                                                                                                                                                                                                                                                                                                                                                                                                                                          |
| 123. Other                                                                                                                                                             | Coche          |                                                                                                                                                                                                                                                                                                                                                                                                                                                                                                                                                                                                                                                                                                                                                                          |

|                                            |       |  |
|--------------------------------------------|-------|--|
| 124. <i>Si coche à 115.</i> Please specify | Texte |  |
|--------------------------------------------|-------|--|

**H. Exposure at work** (*sous-questionnaire si coche à 118 ou 119 ou 122*)

| Variable                                                                                                                                            | Type           | Réponses                                                                    |
|-----------------------------------------------------------------------------------------------------------------------------------------------------|----------------|-----------------------------------------------------------------------------|
| 125. What is your profession?                                                                                                                       | Texte          |                                                                             |
| In which sector(s) do you study or work? (several possible answers)                                                                                 |                |                                                                             |
| 126. Agriculture                                                                                                                                    | Coche          |                                                                             |
| 127. Industrial manufacturing                                                                                                                       | Coche          |                                                                             |
| 128. Production and distribution of energy, of water                                                                                                | Coche          |                                                                             |
| 129. Waste management                                                                                                                               | Coche          |                                                                             |
| 130. Construction                                                                                                                                   | Coche          |                                                                             |
| 131. Agri-food trade                                                                                                                                | Coche          |                                                                             |
| 132. Whole sale and retail sale                                                                                                                     | Coche          |                                                                             |
| 133. Transportation and storage                                                                                                                     | Coche          |                                                                             |
| 134. Postal and courier activities                                                                                                                  | Coche          |                                                                             |
| 135. Accomodation and catering                                                                                                                      | Coche          |                                                                             |
| 136. Information and communication                                                                                                                  | Coche          |                                                                             |
| 137. Financial and insurance activities, real estate                                                                                                | Coche          |                                                                             |
| 138. Specialised, scientific and technical activities                                                                                               | Coche          |                                                                             |
| 139. Legal, accounting and management activities                                                                                                    | Coche          |                                                                             |
| 140. Architectural and engineering activities                                                                                                       | Coche          |                                                                             |
| 141. Scientific research and development                                                                                                            | Coche          |                                                                             |
| 142. Administrative and support service activities                                                                                                  | Coche          |                                                                             |
| 143. Public administration                                                                                                                          | Coche          |                                                                             |
| 144. Education                                                                                                                                      | Coche          |                                                                             |
| 145. Human health and social action                                                                                                                 | Coche          |                                                                             |
| 146. Arts, entertainment and recreation                                                                                                             | Coche          |                                                                             |
| 147. Other                                                                                                                                          | Coche          |                                                                             |
| 148. <i>Si coche à 140.</i> Please specify                                                                                                          | Texte          |                                                                             |
| 149. <i>Si coche à 138.</i> In what type of establishment do you work (only one possible answer)?                                                   | Menu déroulant | hospital / outpatient clinic / medical office / EMS / ESE / CMS             |
| 150. <i>Si coche à 148.</i> During your work, are you or were you in direct contact with sick people?                                               | Binaire        | yes / no                                                                    |
| 151. <i>Si oui à 148.</i> Among these sick patients, are there any that are or were suspected of having COVID-19?                                   | Binaire        | yes / no / don't know                                                       |
| 152. <i>Si coche à 138.</i> During your work, did you wear a mask (surgical mask, II or or IIR)?                                                    | Catégoriel     | Yes, all the time / yes, only when I was in contact with a sick person / no |
| 153. <i>Si coche à 138.</i> Was there a period of time during which you were in contact with a sick person and that you were unable to wear a mask? | Binaire        | yes / no                                                                    |
| 154. <i>Si oui à 145.</i> During how many days?                                                                                                     | Nombre         | ##                                                                          |
| 155. Since the beginning of the COVID-19 epidemic, has there been a change in your working conditions?                                              | Binaire        | yes / no                                                                    |
| <i>Si oui à 147.</i> Please specify (several possible answers)                                                                                      |                |                                                                             |
| 156. <i>Si oui à 147.</i> Decrease in activity                                                                                                      | Coche          |                                                                             |
| 157. <i>Si oui à 147.</i> Stopped activity                                                                                                          | Coche          |                                                                             |
| 158. <i>Si oui à 147.</i> Use of teleworking (remote working)                                                                                       | Coche          |                                                                             |
| 159. <i>Si oui à 147.</i> Sick leave                                                                                                                | Coche          |                                                                             |
| 160. <i>Si oui à 147.</i> Unemployment                                                                                                              | Coche          |                                                                             |
| 161. <i>Si oui à 147.</i> Other                                                                                                                     | Coche          |                                                                             |
| 162. <i>Si coche à 153.</i> Please specify                                                                                                          | Texte          |                                                                             |
| 163. <i>Si pas de coche à 148.</i> During the confinement (March 16 to May 10) did you continue to go to your workplace?                            | Menu déroulant | yes most of the time / yes, but only part of the time / no                  |
| 164. <i>Si oui à 166.</i> In relation to the preventive measures recommended by the authorities?                                                    |                |                                                                             |
| 165. Were you able to respect the hygiene rules at work?                                                                                            | Menu déroulant | yes / mostly yes / mostly no / no                                           |
| 166. Were you able to respect the « social distancing » measures at work?                                                                           | Menu déroulant | yes / mostly yes / mostly no / no                                           |
| 167. Was there disinfectant made available at work?                                                                                                 | Binaire        | yes / no                                                                    |
| 168. Were masks available at work?                                                                                                                  | Binaire        | yes / no                                                                    |
| 169. Were physical barriers (i.e. plexiglas) made available at work?                                                                                | Binaire        | yes / no                                                                    |
| 170. Since the beginning of the COVID-19 epidemic, did you go to work at the Swiss border or on the other side of the border?                       | Binaire        | yes / only in the beginning / no                                            |
| 171. <i>Si oui à 167.</i> Please specify in which neighbouring country/countries you went to work (several possible answers)                        | Menu déroulant | France / Italy / Germany / Austria / Liechtenstein                          |
